# Supplementary material for: PTSD and Depression Symptoms Increase Women’s Risk for Experiencing Future Intimate Partner Violence
Source: MDPI journal article supplement (doi:10.3390/ijerph191912217), 2022-09-26
Supplement: s1 [file s1]

**Supplementary Table S1.** Models predicting the bidirectional associations between IPV experience and PTSD symptoms, depression symptoms, or alcohol use.

| Path                                   | $\beta$       | SE           | <i>p</i> -Value  |
|----------------------------------------|---------------|--------------|------------------|
| <b>PTSD Model</b>                      |               |              |                  |
| DV: T2 IPV                             |               |              |                  |
| T1 IPV                                 | <b>0.384</b>  | <b>0.040</b> | <b>&lt;0.001</b> |
| T1 PTSD symptoms                       | <b>0.149</b>  | <b>0.034</b> | <b>&lt;0.001</b> |
| Age                                    | -0.049        | 0.025        | 0.053            |
| Combat experience                      | 0.033         | 0.027        | 0.219            |
| Sexual assault during military service | 0.040         | 0.032        | 0.205            |
| DV: T3 IPV                             |               |              |                  |
| T1 IPV                                 | <b>0.118</b>  | <b>0.051</b> | <b>0.021</b>     |
| T2 IPV                                 | <b>0.171</b>  | <b>0.057</b> | <b>0.003</b>     |
| T1 PTSD symptoms                       | 0.033         | 0.060        | 0.586            |
| T2 PTSD symptoms                       | <b>0.138</b>  | <b>0.063</b> | <b>0.028</b>     |
| Age                                    | -0.044        | 0.033        | 0.177            |
| Combat experience                      | 0.003         | 0.033        | 0.924            |
| Sexual assault during military service | 0.038         | 0.036        | 0.294            |
| DV: T1 IPV                             |               |              |                  |
| Age                                    | <b>-0.067</b> | <b>0.024</b> | <b>0.005</b>     |
| Combat experience                      | 0.024         | 0.024        | 0.319            |
| Sexual assault during military service | <b>0.06</b>   | <b>0.025</b> | <b>0.017</b>     |
| DV: T1 PTSD symptoms                   |               |              |                  |
| Age                                    | 0.018         | 0.025        | 0.463            |
| Combat experience                      | <b>0.100</b>  | <b>0.025</b> | <b>&lt;0.001</b> |
| MST                                    | <b>0.286</b>  | <b>0.024</b> | <b>&lt;0.001</b> |
| DV: T2 PTSD symptoms                   |               |              |                  |
| T1 IPV                                 | <b>0.053</b>  | <b>0.025</b> | <b>0.037</b>     |
| T1 PTSD symptoms                       | <b>0.714</b>  | <b>0.022</b> | <b>&lt;0.001</b> |
| Age                                    | <b>0.054</b>  | <b>0.024</b> | <b>0.026</b>     |

|                                        |               |              |                  |
|----------------------------------------|---------------|--------------|------------------|
| Combat experience                      | 0.041         | 0.023        | 0.074            |
| Sexual assault during military service | <b>0.086</b>  | <b>0.024</b> | <b>&lt;0.001</b> |
| DV: T3 PTSD symptoms                   |               |              |                  |
| T1 IPV                                 | -0.041        | 0.025        | 0.105            |
| T2 IPV                                 | 0.025         | 0.027        | 0.346            |
| T1 PTSD symptoms                       | <b>0.272</b>  | <b>0.054</b> | <b>&lt;0.001</b> |
| T2 PTSD symptoms                       | <b>0.589</b>  | <b>0.054</b> | <b>&lt;0.001</b> |
| Age                                    | 0.02          | 0.028        | 0.464            |
| Combat experience                      | -0.011        | 0.022        | 0.626            |
| Sexual assault during military service | 0.016         | 0.024        | 0.512            |
| Covariances                            |               |              |                  |
| T1 IPV <--> T1 PTSD symptoms           | <b>0.164</b>  | <b>0.027</b> | <b>&lt;0.001</b> |
| T2 IPV <--> T2 PTSD symptoms           | 0.049         | 0.035        | 0.158            |
| T3 IPV <--> T3 PTSD symptoms           | 0.074         | 0.050        | 0.140            |
| <b>Depression Model</b>                |               |              |                  |
| DV: T2 IPV                             |               |              |                  |
| T1 IPV                                 | <b>0.381</b>  | <b>0.041</b> | <b>&lt;0.001</b> |
| T1 Depression symptoms                 | <b>0.134</b>  | <b>0.031</b> | <b>&lt;0.001</b> |
| Age                                    | <b>-0.051</b> | <b>0.025</b> | <b>0.042</b>     |
| Combat experience                      | 0.038         | 0.027        | 0.155            |
| Sexual assault during military service | 0.041         | 0.032        | 0.193            |
| DV: T3 IPV                             |               |              |                  |
| T1 IPV                                 | <b>0.108</b>  | <b>0.051</b> | <b>0.034</b>     |
| T2 IPV                                 | <b>0.165</b>  | <b>0.058</b> | <b>0.004</b>     |
| T1 Depression symptoms                 | 0.059         | 0.065        | 0.365            |
| T2 Depression symptoms                 | <b>0.137</b>  | <b>0.069</b> | <b>0.046</b>     |
| Age                                    | -0.041        | 0.033        | 0.216            |
| Combat experience                      | 0.005         | 0.032        | 0.873            |
| Sexual assault during military service | 0.027         | 0.037        | 0.467            |
| DV: T1 IPV                             |               |              |                  |

|                                        |  |               |              |                  |
|----------------------------------------|--|---------------|--------------|------------------|
| Age                                    |  | <b>-0.066</b> | <b>0.024</b> | <b>0.005</b>     |
| Combat experience                      |  | 0.024         | 0.024        | 0.320            |
| Sexual assault during military service |  | <b>0.060</b>  | <b>0.025</b> | <b>0.017</b>     |
| DV: T1 Depression symptoms             |  |               |              |                  |
| Age                                    |  | <b>0.050</b>  | <b>0.022</b> | <b>0.025</b>     |
| Combat experience                      |  | <b>0.088</b>  | <b>0.023</b> | <b>&lt;0.001</b> |
| Sexual assault during military service |  | <b>0.306</b>  | <b>0.023</b> | <b>&lt;0.001</b> |
| DV: T2 Depression symptoms             |  |               |              |                  |
| T1 IPV                                 |  | 0.031         | 0.025        | 0.219            |
| T1 Depression symptoms                 |  | <b>0.715</b>  | <b>0.021</b> | <b>&lt;0.001</b> |
| Age                                    |  | -0.028        | 0.02         | 0.174            |
| Combat experience                      |  | <b>0.044</b>  | <b>0.019</b> | <b>0.024</b>     |
| Sexual assault during military service |  | <b>0.098</b>  | <b>0.023</b> | <b>&lt;0.001</b> |
| DV: T3 Depression symptoms             |  |               |              |                  |
| T1 IPV                                 |  | -0.010        | 0.027        | 0.722            |
| T2 IPV                                 |  | 0.001         | 0.027        | 0.966            |
| T1 Depression symptoms                 |  | <b>0.330</b>  | <b>0.047</b> | <b>&lt;0.001</b> |
| T2 Depression symptoms                 |  | <b>0.518</b>  | <b>0.047</b> | <b>&lt;0.001</b> |
| Age                                    |  | 0.017         | 0.022        | 0.451            |
| Combat experience                      |  | <b>-0.039</b> | <b>0.019</b> | <b>0.042</b>     |
| Sexual assault during military service |  | 0.035         | 0.024        | 0.139            |
| Covariances                            |  |               |              |                  |
| T1 IPV <--> T1 Depression symptoms     |  | <b>0.214</b>  | <b>0.026</b> | <b>&lt;0.001</b> |
| T2 IPV <--> T2 Depression symptoms     |  | <b>0.102</b>  | <b>0.038</b> | <b>0.007</b>     |
| T3 IPV <--> T3 Depression symptoms     |  | <b>0.092</b>  | <b>0.046</b> | <b>0.044</b>     |
| <b>Alcohol Use Model</b>               |  |               |              |                  |
| DV: T2 IPV                             |  |               |              |                  |
| T1 IPV                                 |  | <b>0.403</b>  | <b>0.041</b> | <b>&lt;0.001</b> |
| T1 Alcohol use                         |  | 0.038         | 0.036        | 0.284            |
| Age                                    |  | -0.039        | 0.025        | 0.124            |

|                                        |               |              |                  |
|----------------------------------------|---------------|--------------|------------------|
| Combat experience                      | 0.043         | 0.028        | 0.116            |
| Sexual assault during military service | <b>0.078</b>  | <b>0.030</b> | <b>0.008</b>     |
| DV: T3 IPV                             |               |              |                  |
| T1 IPV                                 | <b>0.125</b>  | <b>0.052</b> | <b>0.015</b>     |
| T2 IPV                                 | <b>0.194</b>  | <b>0.059</b> | <b>0.001</b>     |
| T1 Alcohol use                         | 0.061         | 0.066        | 0.351            |
| T2 Alcohol use                         | 0.015         | 0.061        | 0.805            |
| Age                                    | -0.028        | 0.034        | 0.404            |
| Combat experience                      | 0.013         | 0.033        | 0.683            |
| Sexual assault during military service | <b>0.077</b>  | <b>0.036</b> | <b>0.034</b>     |
| DV: T1 IPV                             |               |              |                  |
| Age                                    | <b>-0.067</b> | <b>0.024</b> | <b>0.005</b>     |
| Combat experience                      | 0.024         | 0.024        | 0.322            |
| Sexual assault during military service | <b>0.060</b>  | <b>0.025</b> | <b>0.017</b>     |
| DV: T1 Alcohol use                     |               |              |                  |
| Age                                    | <b>-0.053</b> | <b>0.025</b> | <b>0.037</b>     |
| Combat experience                      | <b>0.083</b>  | <b>0.026</b> | <b>0.002</b>     |
| Sexual assault during military service | <b>0.092</b>  | <b>0.029</b> | <b>0.001</b>     |
| DV: T2 Alcohol use                     |               |              |                  |
| T1 IPV                                 | -0.004        | 0.026        | 0.884            |
| T1 Alcohol use                         | <b>0.738</b>  | <b>0.029</b> | <b>&lt;0.001</b> |
| Age                                    | 0.042         | 0.022        | 0.050            |
| Combat experience                      | -0.013        | 0.023        | 0.559            |
| Sexual assault during military service | <b>-0.072</b> | <b>0.025</b> | <b>0.003</b>     |
| DV: T3 Alcohol use                     |               |              |                  |
| T1 IPV                                 | -0.005        | 0.029        | 0.850            |
| T2 IPV                                 | -0.001        | 0.030        | 0.975            |
| T1 Alcohol use                         | <b>0.279</b>  | <b>0.068</b> | <b>&lt;0.001</b> |
| T2 Alcohol use                         | <b>0.576</b>  | <b>0.059</b> | <b>&lt;0.001</b> |
| Age                                    | 0.023         | 0.022        | 0.303            |

| Combat experience                      | 0.025         | 0.021        | 0.233            |
|----------------------------------------|---------------|--------------|------------------|
| Sexual assault during military service | -0.043        | 0.023        | 0.060            |
| Covariances                            |               |              |                  |
| T1 IPV <--> T1 Alcohol use             | <b>0.085</b>  | <b>0.030</b> | <b>0.004</b>     |
| T2 IPV <--> T2 Alcohol use             | -0.016        | 0.040        | 0.682            |
| T3 IPV <--> T3 Alcohol use             | <b>-0.100</b> | <b>0.048</b> | <b>0.036</b>     |
| Path                                   | $\beta$       | SE           | p-Value          |
| <b>PTSD Model</b>                      |               |              |                  |
| DV: T2 IPV                             |               |              |                  |
| T1 IPV                                 | <b>0.384</b>  | <b>0.040</b> | <b>&lt;0.001</b> |
| T1 PTSD symptoms                       | <b>0.149</b>  | <b>0.034</b> | <b>&lt;0.001</b> |
| Age                                    | -0.049        | 0.025        | 0.053            |
| Combat experience                      | 0.033         | 0.027        | 0.219            |
| Sexual assault during military service | 0.040         | 0.032        | 0.205            |
| DV: T3 IPV                             |               |              |                  |
| T1 IPV                                 | <b>0.118</b>  | <b>0.051</b> | <b>0.021</b>     |
| T2 IPV                                 | <b>0.171</b>  | <b>0.057</b> | <b>0.003</b>     |
| T1 PTSD symptoms                       | 0.033         | 0.060        | 0.586            |
| T2 PTSD symptoms                       | <b>0.138</b>  | <b>0.063</b> | <b>0.028</b>     |
| Age                                    | -0.044        | 0.033        | 0.177            |
| Combat experience                      | 0.003         | 0.033        | 0.924            |
| Sexual assault during military service | 0.038         | 0.036        | 0.294            |
| DV: T1 IPV                             |               |              |                  |
| Age                                    | <b>-0.067</b> | <b>0.024</b> | <b>0.005</b>     |
| Combat experience                      | 0.024         | 0.024        | 0.319            |
| Sexual assault during military service | <b>0.06</b>   | <b>0.025</b> | <b>0.017</b>     |
| DV: T1 PTSD symptoms                   |               |              |                  |
| Age                                    | 0.018         | 0.025        | 0.463            |
| Combat experience                      | <b>0.100</b>  | <b>0.025</b> | <b>&lt;0.001</b> |
| MST                                    | <b>0.286</b>  | <b>0.024</b> | <b>&lt;0.001</b> |
| DV: T2 PTSD symptoms                   |               |              |                  |
| T1 IPV                                 | <b>0.053</b>  | <b>0.025</b> | <b>0.037</b>     |
| T1 PTSD symptoms                       | <b>0.714</b>  | <b>0.022</b> | <b>&lt;0.001</b> |
| Age                                    | <b>0.054</b>  | <b>0.024</b> | <b>0.026</b>     |
| Combat experience                      | 0.041         | 0.023        | 0.074            |
| Sexual assault during military service | <b>0.086</b>  | <b>0.024</b> | <b>&lt;0.001</b> |
| DV: T3 PTSD symptoms                   |               |              |                  |
| T1 IPV                                 | -0.041        | 0.025        | 0.105            |
| T2 IPV                                 | 0.025         | 0.027        | 0.346            |
| T1 PTSD symptoms                       | <b>0.272</b>  | <b>0.054</b> | <b>&lt;0.001</b> |
| T2 PTSD symptoms                       | <b>0.589</b>  | <b>0.054</b> | <b>&lt;0.001</b> |
| Age                                    | 0.02          | 0.028        | 0.464            |
| Combat experience                      | -0.011        | 0.022        | 0.626            |
| Sexual assault during military service | 0.016         | 0.024        | 0.512            |

|                                        |        |       |        |  |
|----------------------------------------|--------|-------|--------|--|
| Covariances                            |        |       |        |  |
| T1 IPV <--> T1 PTSD symptoms           | 0.164  | 0.027 | <0.001 |  |
| T2 IPV <--> T2 PTSD symptoms           | 0.049  | 0.035 | 0.158  |  |
| T3 IPV <--> T3 PTSD symptoms           | 0.074  | 0.050 | 0.140  |  |
| Depression Model                       |        |       |        |  |
| DV: T2 IPV                             |        |       |        |  |
| T1 IPV                                 | 0.381  | 0.041 | <0.001 |  |
| T1 Depression symptoms                 | 0.134  | 0.031 | <0.001 |  |
| Age                                    | -0.051 | 0.025 | 0.042  |  |
| Combat experience                      | 0.038  | 0.027 | 0.155  |  |
| Sexual assault during military service | 0.041  | 0.032 | 0.193  |  |
| DV: T3 IPV                             |        |       |        |  |
| T1 IPV                                 | 0.108  | 0.051 | 0.034  |  |
| T2 IPV                                 | 0.165  | 0.058 | 0.004  |  |
| T1 Depression symptoms                 | 0.059  | 0.065 | 0.365  |  |
| T2 Depression symptoms                 | 0.137  | 0.069 | 0.046  |  |
| Age                                    | -0.041 | 0.033 | 0.216  |  |
| Combat experience                      | 0.005  | 0.032 | 0.873  |  |
| Sexual assault during military service | 0.027  | 0.037 | 0.467  |  |
| DV: T1 IPV                             |        |       |        |  |
| Age                                    | -0.066 | 0.024 | 0.005  |  |
| Combat experience                      | 0.024  | 0.024 | 0.320  |  |
| Sexual assault during military service | 0.060  | 0.025 | 0.017  |  |
| DV: T1 Depression symptoms             |        |       |        |  |
| Age                                    | 0.050  | 0.022 | 0.025  |  |
| Combat experience                      | 0.088  | 0.023 | <0.001 |  |
| Sexual assault during military service | 0.306  | 0.023 | <0.001 |  |
| DV: T2 Depression symptoms             |        |       |        |  |
| T1 IPV                                 | 0.031  | 0.025 | 0.219  |  |
| T1 Depression symptoms                 | 0.715  | 0.021 | <0.001 |  |
| Age                                    | -0.028 | 0.02  | 0.174  |  |
| Combat experience                      | 0.044  | 0.019 | 0.024  |  |
| Sexual assault during military service | 0.098  | 0.023 | <0.001 |  |
| DV: T3 Depression symptoms             |        |       |        |  |
| T1 IPV                                 | -0.010 | 0.027 | 0.722  |  |
| T2 IPV                                 | 0.001  | 0.027 | 0.966  |  |
| T1 Depression symptoms                 | 0.330  | 0.047 | <0.001 |  |
| T2 Depression symptoms                 | 0.518  | 0.047 | <0.001 |  |
| Age                                    | 0.017  | 0.022 | 0.451  |  |
| Combat experience                      | -0.039 | 0.019 | 0.042  |  |
| Sexual assault during military service | 0.035  | 0.024 | 0.139  |  |
| Covariances                            |        |       |        |  |
| T1 IPV <--> T1 Depression symptoms     | 0.214  | 0.026 | <0.001 |  |
| T2 IPV <--> T2 Depression symptoms     | 0.102  | 0.038 | 0.007  |  |
| T3 IPV <--> T3 Depression symptoms     | 0.092  | 0.046 | 0.044  |  |
| Alcohol Use Model                      |        |       |        |  |
| DV: T2 IPV                             |        |       |        |  |

|                                        |               |              |                  |
|----------------------------------------|---------------|--------------|------------------|
| T1 IPV                                 | <b>0.403</b>  | <b>0.041</b> | <b>&lt;0.001</b> |
| T1 Alcohol use                         | 0.038         | 0.036        | 0.284            |
| Age                                    | -0.039        | 0.025        | 0.124            |
| Combat experience                      | 0.043         | 0.028        | 0.116            |
| Sexual assault during military service | <b>0.078</b>  | <b>0.030</b> | <b>0.008</b>     |
| DV: T3 IPV                             |               |              |                  |
| T1 IPV                                 | <b>0.125</b>  | <b>0.052</b> | <b>0.015</b>     |
| T2 IPV                                 | <b>0.194</b>  | <b>0.059</b> | <b>0.001</b>     |
| T1 Alcohol use                         | 0.061         | 0.066        | 0.351            |
| T2 Alcohol use                         | 0.015         | 0.061        | 0.805            |
| Age                                    | -0.028        | 0.034        | 0.404            |
| Combat experience                      | 0.013         | 0.033        | 0.683            |
| Sexual assault during military service | <b>0.077</b>  | <b>0.036</b> | <b>0.034</b>     |
| DV: T1 IPV                             |               |              |                  |
| Age                                    | <b>-0.067</b> | <b>0.024</b> | <b>0.005</b>     |
| Combat experience                      | 0.024         | 0.024        | 0.322            |
| Sexual assault during military service | <b>0.060</b>  | <b>0.025</b> | <b>0.017</b>     |
| DV: T1 Alcohol use                     |               |              |                  |
| Age                                    | <b>-0.053</b> | <b>0.025</b> | <b>0.037</b>     |
| Combat experience                      | <b>0.083</b>  | <b>0.026</b> | <b>0.002</b>     |
| Sexual assault during military service | <b>0.092</b>  | <b>0.029</b> | <b>0.001</b>     |
| DV: T2 Alcohol use                     |               |              |                  |
| T1 IPV                                 | -0.004        | 0.026        | 0.884            |
| T1 Alcohol use                         | <b>0.738</b>  | <b>0.029</b> | <b>&lt;0.001</b> |
| Age                                    | 0.042         | 0.022        | 0.050            |
| Combat experience                      | -0.013        | 0.023        | 0.559            |
| Sexual assault during military service | <b>-0.072</b> | <b>0.025</b> | <b>0.003</b>     |
| DV: T3 Alcohol use                     |               |              |                  |
| T1 IPV                                 | -0.005        | 0.029        | 0.850            |
| T2 IPV                                 | -0.001        | 0.030        | 0.975            |
| T1 Alcohol use                         | <b>0.279</b>  | <b>0.068</b> | <b>&lt;0.001</b> |
| T2 Alcohol use                         | <b>0.576</b>  | <b>0.059</b> | <b>&lt;0.001</b> |
| Age                                    | 0.023         | 0.022        | 0.303            |
| Combat experience                      | 0.025         | 0.021        | 0.233            |
| Sexual assault during military service | -0.043        | 0.023        | 0.060            |
| Covariances                            |               |              |                  |
| T1 IPV <--> T1 Alcohol use             | <b>0.085</b>  | <b>0.030</b> | <b>0.004</b>     |
| T2 IPV <--> T2 Alcohol use             | -0.016        | 0.040        | 0.682            |
| T3 IPV <--> T3 Alcohol use             | <b>-0.100</b> | <b>0.048</b> | <b>0.036</b>     |

*Note.* Bolding indicates a significant result. DV = dependent variable; T1 = Time 1; T2 = Time 2; T3 = Time 3; SE = standard error.
